# Supplementary material for: Supramolecular 1D ribbons in complexes between a bicyclic-guanidine derivative and di- or monocarboxylic acids
Source: Royal Society of Chemistry journal article supplement (doi:10.1039/c3ce40960k), 2013-07-11

## Supramolecular 1D ribbons in complexes between a bicyclic guanidine derivative and di- or monocarboxylic acids.

Vitthal N. Yadav and Carl Henrik Görbitz\*

Department of Chemistry, University of Oslo, P.O.Box 1033 Blindern, N-0315 Oslo, Norway

Correspondence email: [c.h.gorbitz@kjemi.uio.no](mailto:c.h.gorbitz@kjemi.uio.no)

Supplementary information

Fig. S1: Layered crystal packing in complex **AdT** viewed along the *b*-axis.

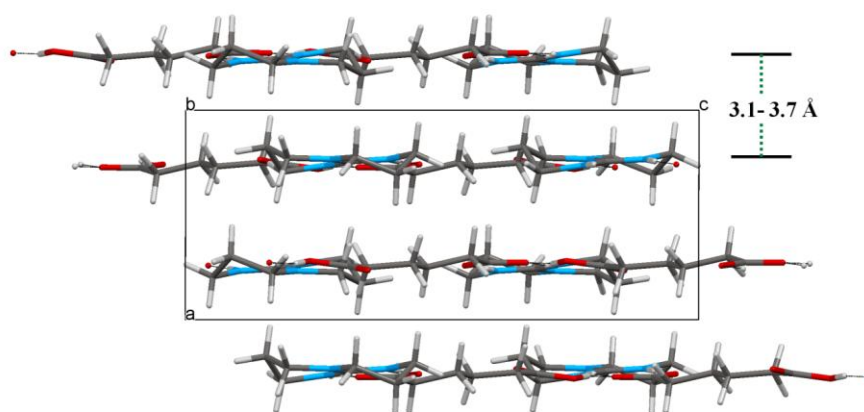

Fig. S2: Hydrogen-bonding network in guanidinium-bicarbonate (Refcode; DUMPUW). Partially related to the **GIT** structure.

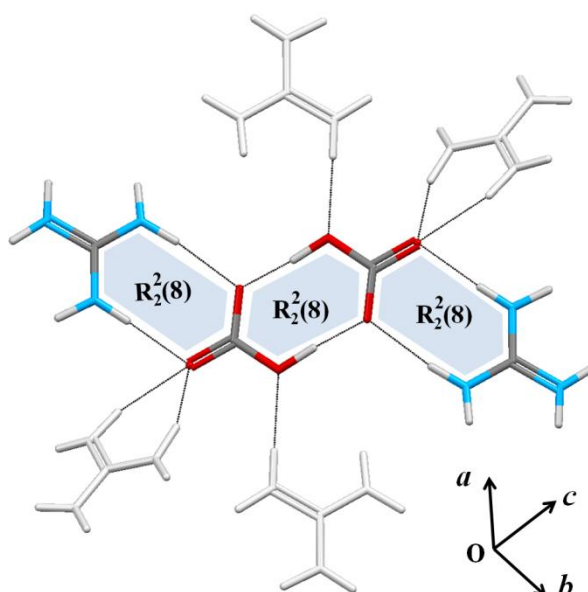

Supplement: c3ce40960k.pdf [file c3ce40960k.pdf]
